# Supplementary material
Source: PubMed Central journal article supplement (PMC6638475)
Supplement: MPP-16-1000-s001.pdf [file MPP-16-1000-s001.pdf]

5' ctgcagcatcgctgacgagaaccactctcttctccacaaccagctctgcttttctgctctgcttttgctc 70  
 o 5'UTR 1  
 o  
 5' tgctctgctctgctctgctctgctctgctttgctttgcctggttccaccctgcctgcaactgcaactgca 140  
 o 5'UTR 1  
 o  
 5' ttgcaccgcaactgaaaactgccctccttctccgccttctcactaccaccgcccgcgcgcgctgctc 210  
 o 5'UTR 1  
 o  
 5' gccgtgctttctgcaactccttctcccaagagggtcccgcctgctgaagaaaacgtgacgggaagatcat 280  
 o 5'UTR 1  
 o  
 5' tcatcagaccagagagttgtgtggttaagtaactgtagttccaatccgtttctcttttagggctatctgct 350  
 o intron 1  
 o 5'UTR 1  
 o  
 5' cccgcctcgatccactcggctctcgtctgcaattgaacagcagcagtagcagtgatagtagcagcagcagc 420  
 o intron 1  
 o 5'UTR 1  
 o  
 5' agcagcagcagcagcagcaacagcaggagtagcaccagcaccacaccagcagtagccacaccagcaata 490  
 o intron 1  
 o 5'UTR 1  
 o  
 5' gcaacaccggcgacagcagcaacagcaatagcttcaacccccacgacatcagcaacagcagtgctcattg 560  
 o intron 1  
 o 5'UTR 1  
 o  
 5' ttgtcgtgctactgctactgctactgctactgctcctgctcctgctcctgctcctgcttctgctcctgc 630  
 o intron 1  
 o 5'UTR 1  
 o  
 5' tctcctaggtacatacttgtacttgtgtaactgtgtaactgtcctgtgtaactgctgctgtggtgggcccc 700  
 o intron 1  
 o 5'UTR 1  
 o  
 5' cttcccggtggtcgtggccgggtacaactgcccagcgtttttccccggtccaccgctcctgtactctttctc 770  
 o intron 1  
 o 5'UTR 1  
 o  
 5' gcctatctacagccacgctggttgggtccacgcccctccaggcgtagagtcaaggcccccatcccaacca 840  
 o intron 1  
 o 5'UTR 1  
 o  
 5' cctccgctgccagcaagagagtacagtcagtaacacaccttcccgcctcccccaccccaccgcagc 910  
 o intron 1  
 o 5'UTR 1  
 o  
 5' ctgcaaaacaagctccccctcctctgccaggctctcagcgtcttactcgtcacctactcaccactca 980  
 o intron 1  
 o 5'UTR 1  
 o  
 5' ctcacacacaacgtacacacccacacccacacacccctctcctcctctttctctctctctctctctc 1050  
 o intron 1  
 o 5'UTR 1

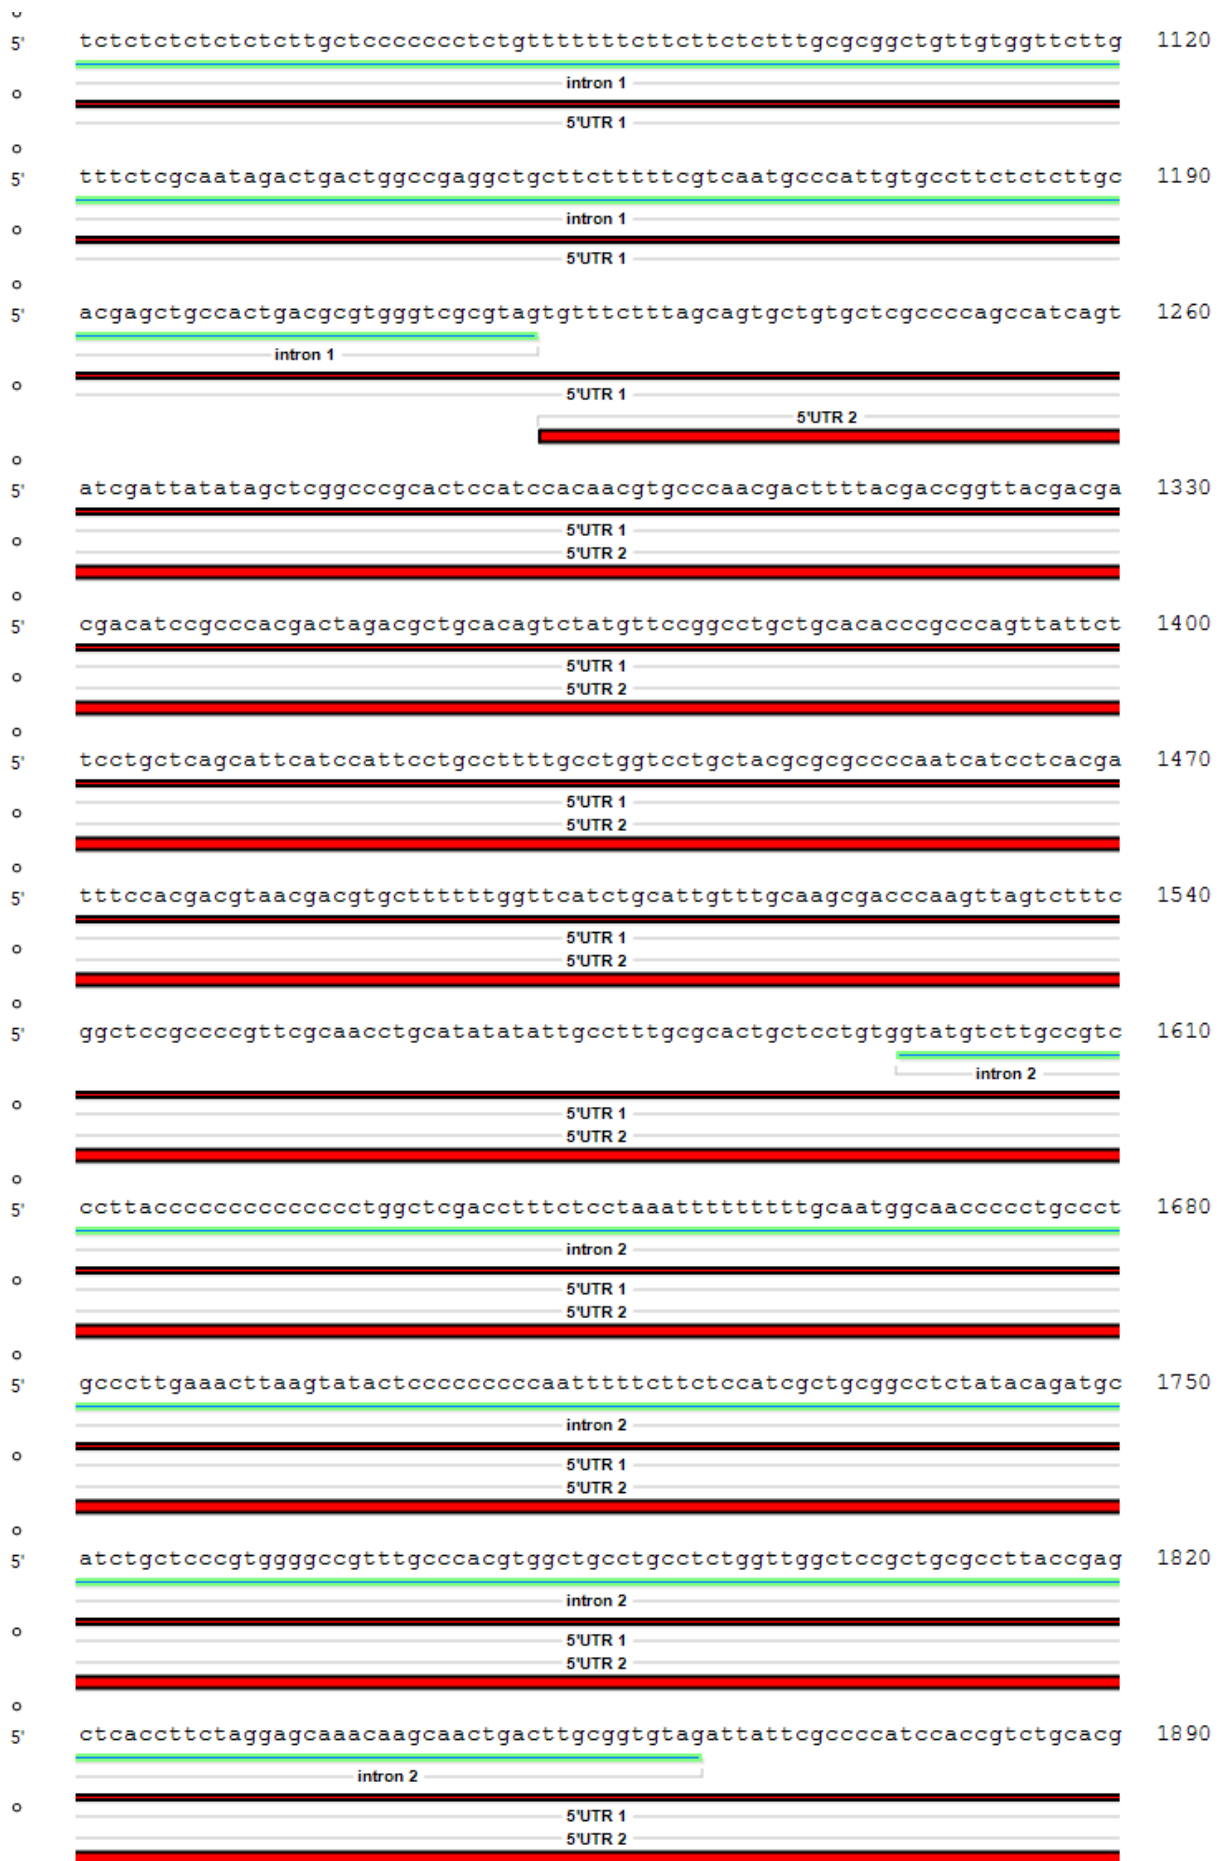

5' agctataaacaccttgaccagcgtctgaccggctacgtggcgacagtcocgcgetccactcaacgctcctg 1960

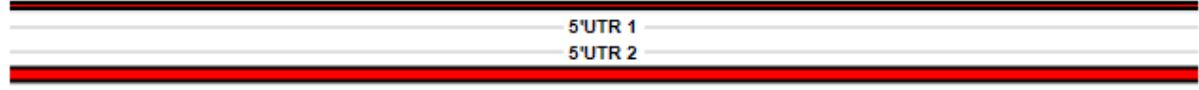

5' ctgctgctgctgctccatcacccctactgctctagacgatcatcagtcctgtgccattgattgactcgagac 2030

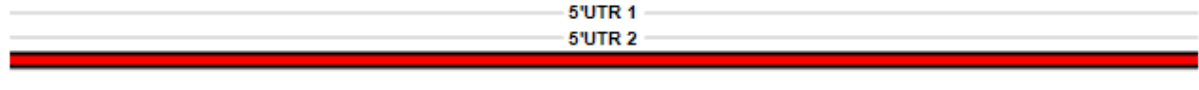

5' gaccogtgaggcgagtttcgacatcacccgagcctttacctcttcttacacgaaccogtgacaatacogt 2100

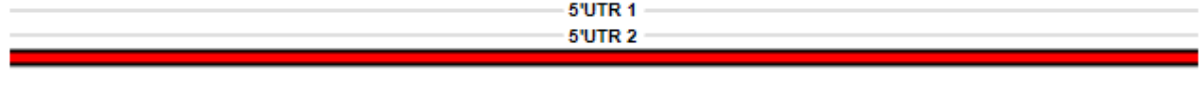

5' aaogtgaggctccogtccatctogtcggttcaogccogggccogtogacacctggtataatcagaac 2170

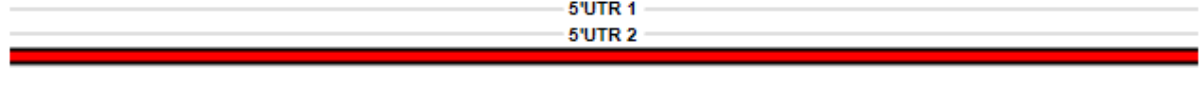

5' ttgocctgaaatctgcagtagcaagtgcagcactcccaccctgcccagatccagccgcacacgagcg 2240

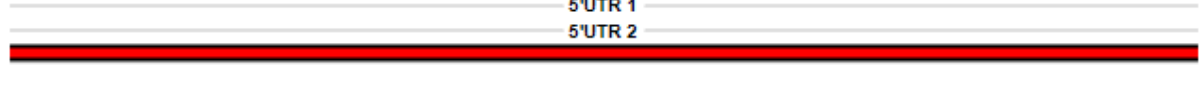

5' gctcgtccaattcctcatcccctcgaggcggctcatttagctcgggaggcgcaagttcaaacacatcgta 2310

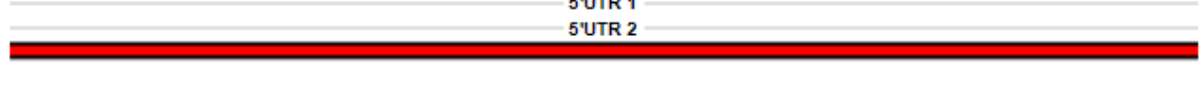

5' cgctgctgcacgcacacoggtcacgcagctgggttcaagacgccttcacccgaacagattcccagctct 2380

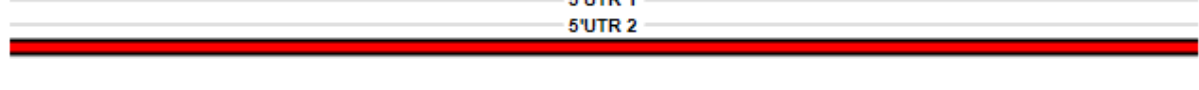

5' ctgcacgcoggtggccagcccgaagcgcagtcacagcaagctcccagtagcgaaccaggaaggct 2450

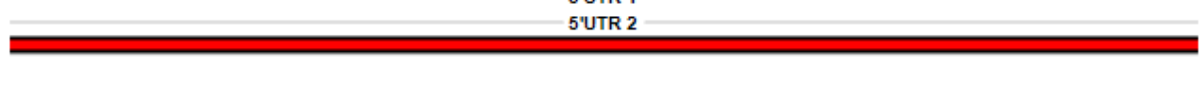

5' acggattcaatcctgctggatacaacagcatgaaccagatgcagccgtatgctgacgtgcaccca 2520

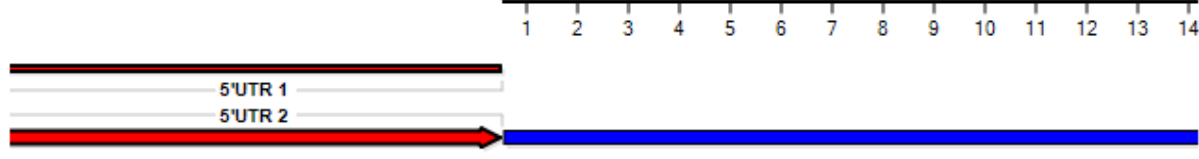

5' catgtctactgcagctcatgcgcccgttcggggcccgccagcagggctttcgcattactcgtaccacat 2590

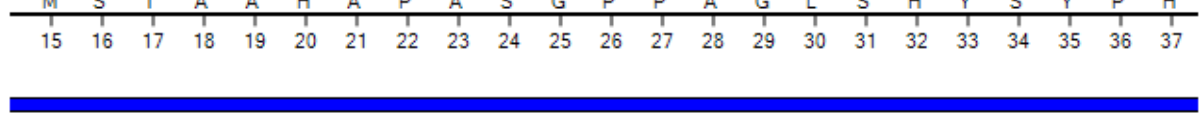

5' cagccgtcgatgatgcagccgcaacaacagcaaacaccaatattggaggacagcccacaggttatccgtatg 2660

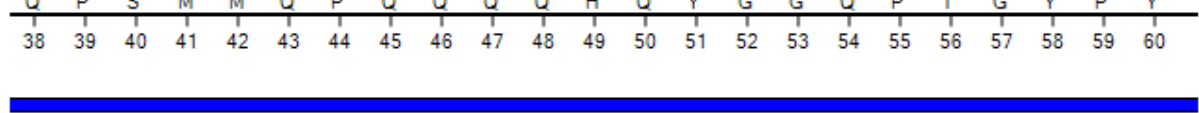

catacaacaacggcggttccatcgcagctaccagcatcttctgcatgaacaacgcgctgggtgccatccac 2730  
A Y N N G V P S Q L P A S S S M N N A L V P S T  
61 62 63 64 65 66 67 68 69 70 71 72 73 74 75 76 77 78 79 80 81 82 83 84

cctccagctaccaggtaggcttgaagatcccaggaccgtacaggtgcatatgctgaccactgtagccatg 2800  
L Q L P A M  
85 86 87 88 89 90

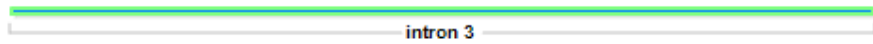

tctgcgggcgccccaaattcatccatgcttggctcccagagctatcagagtcatacttttgatcatactg 2870  
S A G A P N S S M P G S Q S Y Q S H T F D H T  
91 92 93 94 95 96 97 98 99 100 101 102 103 104 105 106 107 108 109 110 111 112 113

gccaaagtggcacctccaggcatgaagccccgtgtaacggctactttgtgggaagacgagggcagtcctttg 2940  
G Q V A P P G M K P R V T A T L W E D E G S L C  
114 115 116 117 118 119 120 121 122 123 124 125 126 127 128 129 130 131 132 133 134 135 136 137

tttccaggtcgaggcgaaaggcgtgtgctgctgcgctgaaggtagatgctgctttccgatgatgtttg 3010  
F Q V E A K G V C V A R R E  
138 139 140 141 142 143 144 145 146 147 148 149 150 151

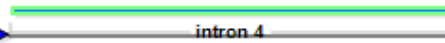

attgccgcaggactgacctcgtgacagacaatcacatgatcaatgggacaaaactactcaacgtagcag 3080  
D N H M I N G T K L L N V A  
152 153 154 155 156 157 158 159 160 161 162 163 164 165

gaatgacgcgaggtcgcagagatggcatcttgaaaagtgagaagacgcgccatgtggtcaagatcggggc 3150  
G M T R G R R D G I L K S E K T R H V V K I G P  
166 167 168 169 170 171 172 173 174 175 176 177 178 179 180 181 182 183 184 185 186 187 188 189

aatgcacctcaagggtgtttggtacgtctctatcctctcctcttccagactgtagtactgatagctcaaaag 3220  
M H L K G V W  
190 191 192 193 194 195 196

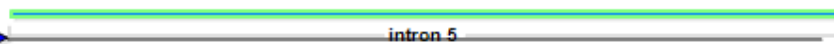

gatccccttcgaacgagctctcgagtttgccaacaagaaaagatcactgagcagotgtaccccctgttt 3290  
I P F E R A L E F A N K E K I T E Q L Y P L F  
197 198 199 200 201 202 203 204 205 206 207 208 209 210 211 212 213 214 215 216 217 218 219

gtccacgacattggggctctgctctatcaccctcaaaccagacgagggcaagtgtaggaggcgctgcca 3360  
V H D I G A L L Y H P S N Q T R A S V G G A A  
220 221 222 223 224 225 226 227 228 229 230 231 232 233 234 235 236 237 238 239 240 241 242

tggctgctgctgatcgtaatcgaagacctgactctatgcagactcagcaacgatacatggcaggaccaac 3430  
M A A V D R N R R P D S M Q T Q Q R Y M A G P T  
243 244 245 246 247 248 249 250 251 252 253 254 255 256 257 258 259 260 261 262 263 264 265 266

gacatcacaggccccgtccctgcatcatcaccattcgatgacgaattcggtagggctccgcatgtcgcag 3500  
T S Q A P S L H H H S M T N S V G S A M S Q  
267 268 269 270 271 272 273 274 275 276 277 278 279 280 281 282 283 284 285 286 287 288 289

cctccgatgccatccaacccccaccatcctctggctgaccagctctcgaccgctcataccttcccaa 3570  
P P H A I Q P H P S S G R P S L D R A H T F P  
290 291 292 293 294 295 296 297 298 299 300 301 302 303 304 305 306 307 308 309 310 311 312

caccacccacgagtgccctcgagcatgatgggtatgggtaatcaaggcagttcgtacgaatggaatggagc 3640  
T P P T S A S S M M G M G N Q G S S Y E W N G A  
313 314 315 316 317 318 319 320 321 322 323 324 325 326 327 328 329 330 331 332 333 334 335 336

taatgtgcaacaacatcctcagggtaatcagcctctgtccattgataccgggctaagcaacgctcctcc 3710  
N V Q Q H P Q G N Q P L S I D T G L S N A R S  
337 338 339 340 341 342 343 344 345 346 347 348 349 350 351 352 353 354 355 356 357 358 359

gtgcccacgacacctgcaagcaccgcccagggtgctgtgcaacaaggattccgtatggctcgtctcaga 3780  
V P T T P A S T P P G A V Q Q G I P Y G S S Q  
360 361 362 363 364 365 366 367 368 369 370 371 372 373 374 375 376 377 378 379 380 381 382

gttatgacggttcgcgacccatgtattctgcacctccggcccagccaagccagtatgcacaaggccaacc 3850  
S Y D G S R P M Y S A P P A Q P S Q Y A Q G Q P  
383 384 385 386 387 388 389 390 391 392 393 394 395 396 397 398 399 400 401 402 403 404 405 406

gatgatgagctaccggccggataatgcatacccaaaagacagaaatggcgccgcttcccgcattagcgat 3920  
M M S Y R P D N A Y P K T E M A P P S R I S D  
407 408 409 410 411 412 413 414 415 416 417 418 419 420 421 422 423 424 425 426 427 428 429

gttccagaagagggcgagggtgaaggcgtctgatgggatgatgccacagggtaacgaacaggttgcagccc 3990  
V P E E G E V K A S D G M M P Q G N E Q V A A  
430 431 432 433 434 435 436 437 438 439 440 441 442 443 444 445 446 447 448 449 450 451 452

ctccagcaggtggcgaggaggagaacgagtagacacgcattccagtgctccgtacaacggaaatcgaggacc 4060  
P P A G G E E E N E Y T H S S A P Y N G N R G P  
453 454 455 456 457 458 459 460 461 462 463 464 465 466 467 468 469 470 471 472 473 474 475 476

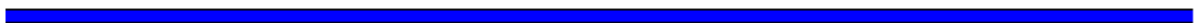

ttatgggtataaccccaacgggtccaccgggaccaatgcacgcgatcatacgcacatctgtgcgccgaaatg 4130  
Y G Y N P N G P P G P M H A D H T H L S P E M  
477 478 479 480 481 482 483 484 485 486 487 488 489 490 491 492 493 494 495 496 497 498 499

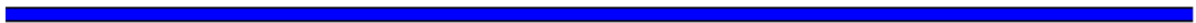

acgggatctcctcatcagaacggatctgggctgacaccccaacgaacggcgactaacgggtcaagctcagt 4200  
T G S P H Q N G S G R A T P R T A T N G Q A Q  
500 501 502 503 504 505 506 507 508 509 510 511 512 513 514 515 516 517 518 519 520 521 522

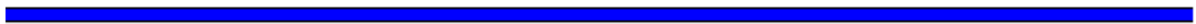

ggggctctagttatcctacaccacaacgacaggcaccaccctctagcaacctgtacaacgtcatgagcga 4270  
W G S S Y P T P Q R Q A P P S S N L Y N V M S D  
523 524 525 526 527 528 529 530 531 532 533 534 535 536 537 538 539 540 541 542 543 544 545 546

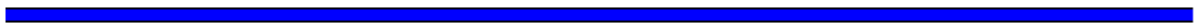

tctagaggcgctcctaattggcaacgctgctcatgatgcataaccagggtcctggtgctgttccgcaatac 4340  
P R G A P N G N A A H D A Y Q G P G A V P Q Y  
547 548 549 550 551 552 553 554 555 556 557 558 559 560 561 562 563 564 565 566 567 568 569

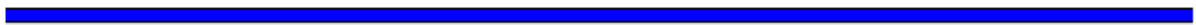

gogagccaagggtatgctcccacgaatggagtgcaactcttctggcaagcgtgggcgcgacgaagaggacg 4410  
A S Q G Y A P T N G V N S S G K R G R D E E D  
570 571 572 573 574 575 576 577 578 579 580 581 582 583 584 585 586 587 588 589 590 591 592

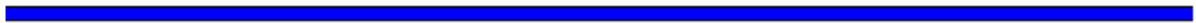

cagagacgtatcgtcctgacagtggtcaagggtgacgacatgggcggcctcaaaagacgcaagacgatgga 4480  
A E T Y R P D S V Q G D D M G G L K R R K T M E  
593 594 595 596 597 598 599 600 601 602 603 604 605 606 607 608 609 610 611 612 613 614 615 616

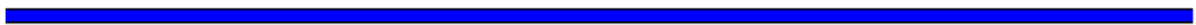

aggcggtgctgtcggccaaacttacgcgcaggacccctctcctggcctccaacgcgcacacaccctggcc 4550  
G G A V G Q T Y A Q D P S P G L Q R A H T L A  
617 618 619 620 621 622 623 624 625 626 627 628 629 630 631 632 633 634 635 636 637 638 639

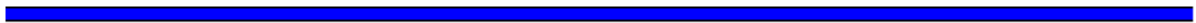

gcacaacgcgccggaggtaacacgcttcacgtgagcaacacgtcgtaccggaggaagactactgatttg 4620  
A Q R A R R  
640 641 642 643 644 645 646

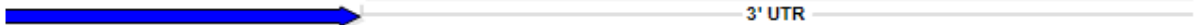

3' UTR

cattttttgcacttagacgggtggtcgaagtttttagtgctcggatcctgaagcggttttttgctgccgtcg 4690

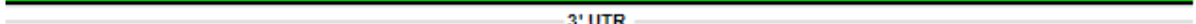

3' UTR

|                                                                          |      |
|--------------------------------------------------------------------------|------|
| tctgtaagcgactcactcggatggatcccgtcaacctcgccttcacctgccatgacatcacatacaccaa   | 4760 |
| 3' UTR                                                                   |      |
| aaaccaccgaaacattacgattacctgactacctctacaccatctttcgttggaagatgcagagcctttc   | 4830 |
| 3' UTR                                                                   |      |
| cttgtgtctactattgtttattcttattttcctgttacattttctgcgccattgtgcattgacgaacttgat | 4900 |
| 3' UTR                                                                   |      |
| gattgtctgcttggttgggttgccttcgacggaccaagcgtatctcgaactctccttctcatgatatacg   | 4970 |
| 3' UTR                                                                   |      |
| actcctgcattcggcatgcgtcttcgcagtatgcttgattgccaaagcttgctttctgatgccgattctg   | 5040 |
| 3' UTR                                                                   |      |
| tactatttcacgaccctttctcgacctttgacgtggttgaatagtgcgagtaaagtcggcgcccgtggc    | 5110 |
| 3' UTR                                                                   |      |
| gcgttggtgccggacactcacttgctcgacgtgggggaaaatcataatctccgctaatactggacacatg   | 5180 |
| 3' UTR                                                                   |      |
| gctggcaaagcgaccgacgacaaggcgtcacaactccctctcttacctgttcgctctcgctgtgttggc    | 5250 |
| 3' UTR                                                                   |      |
| atagcacggcgggcaaatgggcaggcgtagacgaatgggaaggactgttacgcgcttgatggaagtatggt  | 5320 |
| 3' UTR                                                                   |      |
| tgtttgaagagccgcagtcgagcttgtagaaggtctttggccatattgtttcctgtgggtggactgagcg   | 5390 |
| 3' UTR                                                                   |      |
| agctggaaaaaatacatgagccgctgtggagtcatgtggggagagatagtggtggcctgaatattcttttt  | 5460 |
| 3' UTR                                                                   |      |
| tgctttcaatttgacgagccggcgacgtcgaccttagggacgatgaggaaggaaaatcaaaagctctttt   | 5530 |
| 3' UTR                                                                   |      |
| ttctttcttctaaaaaaacaaacaaacaaacaaacaa                                    |      |
| 3' UTR                                                                   |      |

**Figure S1.** - Nucleotidic sequence of the genomic region encoding *LmStuA* and amino-acid sequence of the corresponding predicted protein. 5' and 3' untranslated regions of the gene are respectively indicated as red / dark red and dark green. Introns are indicated as green.
